# Supplementary material for: Synthesis, crystal structure, magnetic property and DFT calculations of an unusual dinuclear μ2-alkoxido bridged iron(iii) complex
Source: Royal Society of Chemistry journal article supplement (doi:10.1039/c3dt51153g), 2013-01-01
Supplement: c3dt51153g.pdf [file c3dt51153g.pdf]

## Supporting Information

### Synthesis, Crystal Structure, Magnetic Property and DFT Calculations of an Unusual Dinuclear $\mu_2$ -Alkoxido Bridged Iron(III) Complex

Rituparna Biswas, Carmen Diaz, Antonio Bauzá, Antonio Frontera,\* Ashutosh Ghosh\*

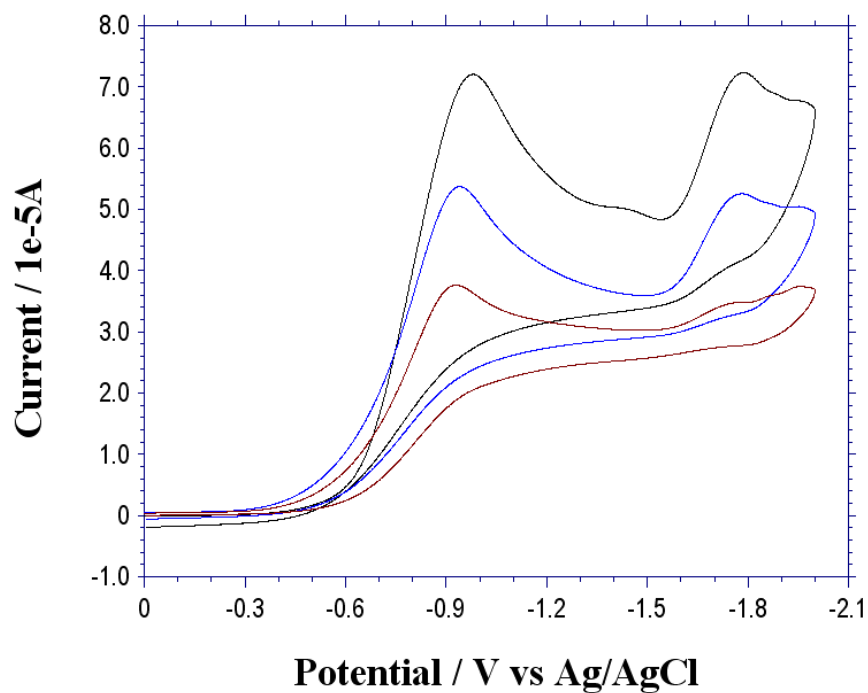

**Figure S1.** Cyclic voltammograms at 298 K in CH<sub>3</sub>CN solvent (0.1 mol dm<sup>-3</sup>, Ag–AgCl reference electrode) at a platinum working electrode of complex **1** at a scan rate of 20, 50 and 100 mV s<sup>-1</sup>.

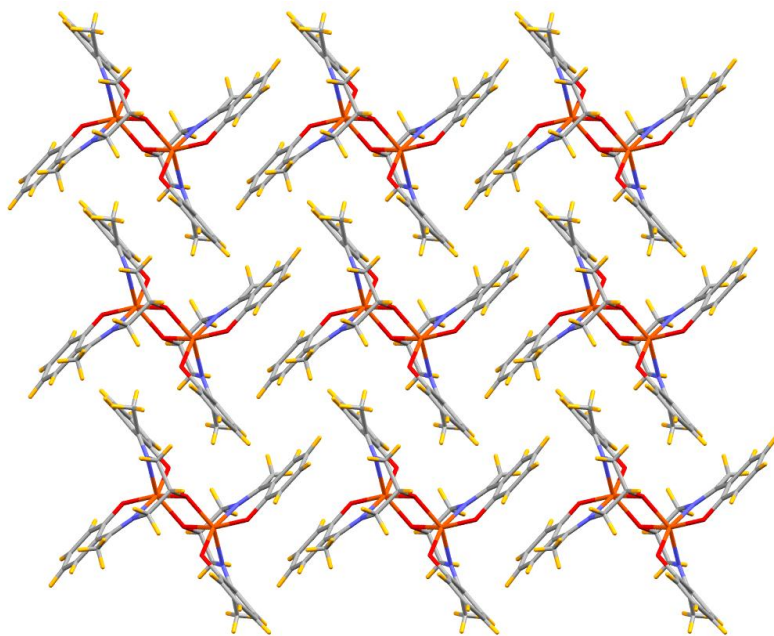

Figure S2. Packing of the complex **1** along crystallographic *b* axis.

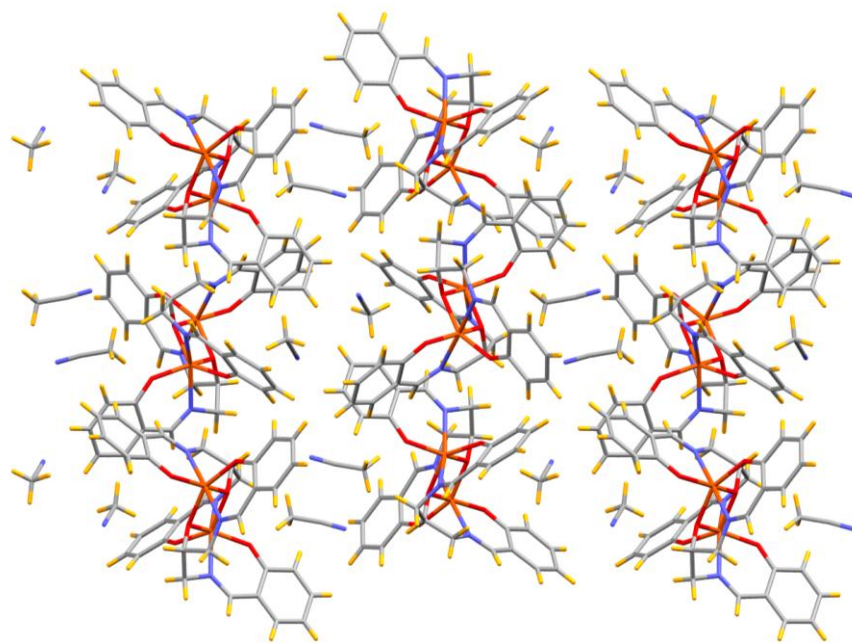

Figure S3. Packing of the complex **3** along crystallographic *a* axis.

**Table S1.** Crystal data and structure refinement of complex **3**.

---

2

|                                          |                                                                                                                    |
|------------------------------------------|--------------------------------------------------------------------------------------------------------------------|
| Formula                                  | C <sub>34</sub> H <sub>30</sub> Fe <sub>2</sub> N <sub>4</sub> O <sub>6</sub> , 2(C <sub>2</sub> H <sub>3</sub> N) |
| M                                        | 784.43                                                                                                             |
| Crystal System                           | Monoclinic                                                                                                         |
| Space Group                              | P21/n (No. 14)                                                                                                     |
| <i>a</i> /Å                              | 11.139(5)                                                                                                          |
| <i>b</i> /Å                              | 14.648(5)                                                                                                          |
| <i>c</i> /Å                              | 22.488(5)                                                                                                          |
| <i>β</i> /°                              | 95.343(5)                                                                                                          |
| <i>V</i> /Å <sup>3</sup>                 | 3653(2)                                                                                                            |
| <i>Z</i>                                 | 4                                                                                                                  |
| <i>D<sub>c</sub></i> /g cm <sup>-3</sup> | 1.426                                                                                                              |
| <i>μ</i> /mm <sup>-1</sup>               | 0.849                                                                                                              |
| F (000)                                  | 1624                                                                                                               |
| R(int)                                   | 0.039                                                                                                              |
| Total Reflections                        | 26607                                                                                                              |
| Unique reflections                       | 7096                                                                                                               |
| <i>I</i> > 2σ( <i>I</i> )                | 5365                                                                                                               |
| R1, wR2                                  | 0.0370, 0.1083                                                                                                     |
| Temp (K)                                 | 293                                                                                                                |

---

**Table S2** Comparison of experimental and theoretical dimensions in the metal coordination sphere, distances, Å, angles (°) of complexes **1** and **3**.

| atom labels       | dist./angle exp. | dist./angle theor. |
|-------------------|------------------|--------------------|
| <b>Complex 1</b>  |                  |                    |
| Fe(1) – O(1)      | 2.058(2)         | 2.097              |
| Fe(1) – O(2)      | 1.902(2)         | 1.934              |
| Fe(1) – O(3)      | 1.927(2)         | 1.972              |
| Fe(1) – N(1)      | 2.127(2)         | 2.163              |
| Fe(1) – N(2)      | 2.188(2)         | 2.222              |
| Fe(1) – O(1)'     | 1.981(2)         | 2.019              |
| O(1)-Fe(1)-O(2)   | 160.62(8)        | 159.18             |
| O(1)-Fe(1)-O(3)   | 109.76(7)        | 111.32             |
| O(1)-Fe(1)-N(1)   | 75.59(7)         | 74.95              |
| O(1)-Fe(1)-N(2)   | 77.78(7)         | 77.50              |
| O(1)-Fe(1)-O(1)'  | 76.51(7)         | 76.63              |
| O(2)-Fe(1)-O(3)   | 89.53(8)         | 89.47              |
| O(2)-Fe(1)-N(1)   | 105.97(8)        | 108.61             |
| O(2)-Fe(1)-N(2)   | 83.12(8)         | 82.39              |
| O(1)'-Fe(1)-O(2)  | 103.73(8)        | 101.87             |
| O(3)-Fe(1)-N(1)   | 83.23(7)         | 81.49              |
| O(3)-Fe(1)-N(2)   | 163.36(7)        | 160.59             |
| O(1)' -Fe(1)-O(3) | 96.86(7)         | 98.90              |
| N(1)-Fe(1)-N(2)   | 84.47(7)         | 84.44              |
| O(1)'-Fe(1)-N(1)  | 150.30(8)        | 149.51             |
| O(1)'-Fe(1)-N(2)  | 99.38(7)         | 100.00             |
| Fe(1)-O(1)-Fe(1)' | 103.49(7)        | 103.37             |
| <b>Complex 3</b>  |                  |                    |
| Fe(1) – O(1)      | 2.015(2)         | 2.055              |
| Fe(1) – O(2)      | 2.021(2)         | 2.050              |
| Fe(1) – O(3)      | 1.923(2)         | 1.965              |
| Fe(1) – N(1)      | 2.134(2)         | 2.169              |
| Fe(1) – N(3)      | 2.139(2)         | 2.170              |
| Fe(1) – O(5)      | 1.934(2)         | 1.966              |
| Fe(2) – O(1)      | 2.052(2)         | 2.087              |
| Fe(2) – O(2)      | 2.019(2)         | 2.091              |
| Fe(2) – O(4)      | 1.932(2)         | 1.970              |
| Fe(2) – O(6)      | 1.919(2)         | 1.971              |
| Fe(2) – N(2)      | 2.151(2)         | 2.198              |
| Fe(2) – N(4)      | 2.167(2)         | 2.203              |
| O(2)-Fe(1)-O(3)   | 93.18(8)         | 96.86              |
| O(2)-Fe(1)-N(1)   | 107.05(7)        | 107.31             |
| O(2)-Fe(1)-N(3)   | 77.08(8)         | 77.10              |
| O(2)-Fe(1)-O(5)   | 158.35(8)        | 156.61             |
| O(3)-Fe(1)-N(1)   | 85.42(8)         | 84.04              |
| O(3)-Fe(1)-N(3)   | 95.01(8)         | 92.56              |
| O(3) -Fe(1)-O(5)  | 100.67(8)        | 97.45              |

|                  |           |        |
|------------------|-----------|--------|
| N(1)-Fe(1)-N(3)  | 175.83(8) | 174.17 |
| N(2)-Fe(2)-N(4)  | 152.79(8) | 152.16 |
| O(1)-Fe(1)-O(2)  | 73.93(7)  | 75.62  |
| O(1)-Fe(1)-O(3)  | 153.64(8) | 156.61 |
| O(1)-Fe(1)-O(5)  | 98.99(7)  | 96.86  |
| O(1)-Fe(1)-N(1)  | 76.93(7)  | 77.10  |
| O(1)-Fe(1)-N(3)  | 104.02(8) | 107.31 |
| Fe(1)-O(1)-Fe(2) | 105.93(7) | 105.16 |
| Fe(1)-O(2)-Fe(2) | 106.98(8) | 105.03 |

### Cartesian coordinates of BP86-D3/def2-TZVP optimized complexes.

#### 1 (with Methyl group)

|    |            |            |            |
|----|------------|------------|------------|
| Fe | -0.7955546 | 0.6509077  | -1.2420433 |
| O  | -1.9336730 | 2.1236021  | -0.5897227 |
| O  | -0.8148447 | -0.9735945 | 0.0850841  |
| O  | -0.3771126 | 1.6954844  | -2.8157413 |
| N  | -2.7253198 | -0.2851977 | -1.5278557 |
| N  | -0.0420755 | -1.0131181 | -2.5078904 |
| C  | -3.8742797 | 1.7677828  | -2.0009221 |
| C  | 0.9267217  | 0.2895048  | -4.3054555 |
| C  | 0.3475204  | 1.5404479  | -3.8913325 |
| C  | -5.1077826 | -0.4897774 | -2.0124711 |
| C  | 0.7115883  | -0.9610789 | -3.5724904 |
| C  | -2.9304336 | 2.6019125  | -1.2966489 |
| C  | -1.2757407 | -2.0573976 | -0.6828506 |
| C  | -3.8339687 | 0.3119914  | -1.8580970 |
| C  | -3.1211330 | 4.0091270  | -1.3480887 |
| C  | -2.6989517 | -1.6981329 | -1.1641329 |
| C  | -0.2899247 | -2.2922438 | -1.8339327 |
| C  | 1.3925513  | -2.2070727 | -4.1088060 |
| C  | 1.7001614  | 0.2845139  | -5.4926807 |
| C  | 0.5696820  | 2.6915226  | -4.6985988 |
| C  | -5.0189453 | 3.7708076  | -2.8341529 |
| C  | 1.3321654  | 2.6377285  | -5.8512074 |
| C  | -4.8917905 | 2.3916465  | -2.7577987 |
| C  | 1.9085549  | 1.4223377  | -6.2575875 |
| C  | -4.1301266 | 4.5798858  | -2.1060710 |
| H  | -1.3265369 | -2.9817108 | -0.0785636 |
| H  | -2.4161069 | 4.6270753  | -0.7907288 |
| H  | -4.2272000 | 5.6669251  | -2.1436411 |

|    |            |            |            |
|----|------------|------------|------------|
| H  | 0.1099159  | 3.6215344  | -4.3625718 |
| H  | -5.5863894 | 1.7706688  | -3.3251807 |
| H  | 2.1467789  | -0.6483085 | -5.8337235 |
| H  | 1.4833043  | 3.5416753  | -6.4447986 |
| H  | -5.8012454 | 4.2176257  | -3.4477736 |
| H  | 2.5103335  | 1.3681050  | -7.1650814 |
| H  | -5.0171476 | -1.2218054 | -2.8298375 |
| H  | -5.9822748 | 0.1399799  | -2.1950123 |
| H  | -5.2934690 | -1.0652803 | -1.0921151 |
| H  | 2.4562646  | -2.0127780 | -4.2975927 |
| H  | 1.3247850  | -3.0446576 | -3.4106017 |
| H  | 0.9429463  | -2.5183615 | -5.0637177 |
| H  | -3.4057916 | -1.8799790 | -0.3356927 |
| H  | -3.0044066 | -2.3485061 | -2.0040525 |
| H  | -0.6858899 | -3.0523264 | -2.5305371 |
| H  | 0.6428316  | -2.6763215 | -1.3872414 |
| Fe | 0.8069213  | -0.6493271 | 1.2438440  |
| O  | 1.9460434  | -2.1231619 | 0.5948879  |
| O  | 0.8279975  | 0.9742916  | -0.0845154 |
| O  | 0.3853839  | -1.6927349 | 2.8172839  |
| N  | 2.7356488  | 0.2856828  | 1.5332806  |
| N  | 0.0501600  | 1.0153858  | 2.5064975  |
| C  | 3.8806105  | -1.7674539 | 2.0143278  |
| C  | -0.9354680 | -0.2888310 | 4.2938008  |
| C  | -0.3540100 | -1.5398296 | 3.8831116  |
| C  | 5.1163040  | 0.4887892  | 2.0276164  |
| C  | -0.7100480 | 0.9633501  | 3.5664189  |
| C  | 2.9398743  | -2.6015732 | 1.3058533  |
| C  | 1.2895168  | 2.0579427  | 0.6835315  |
| C  | 3.8423233  | -0.3119306 | 1.8693265  |
| C  | 3.1308038  | -4.0087601 | 1.3577488  |
| C  | 2.7118992  | 1.6977138  | 1.1661685  |
| C  | 0.3032904  | 2.2945292  | 1.8341823  |
| C  | -1.3899965 | 2.2097611  | 4.1029426  |
| C  | -1.7248073 | -0.2861856 | 5.4704980  |
| C  | -0.5902251 | -2.6933604 | 4.6828358  |
| C  | 5.0203178  | -3.7703009 | 2.8544670  |
| C  | -1.3686597 | -2.6419137 | 5.8248260  |
| C  | 4.8938748  | -2.3911664 | 2.7769914  |
| C  | -1.9470824 | -1.4263826 | 6.2279190  |
| C  | 4.1357305  | -4.5793972 | 2.1212154  |
| H  | 1.3417315  | 2.9819779  | 0.0789216  |
| H  | 2.4290016  | -4.6267909 | 0.7964266  |
| H  | 4.2327830  | -5.6664244 | 2.1591810  |
| H  | -0.1282677 | -3.6233001 | 4.3496129  |
| H  | 5.5857242  | -1.7699905 | 3.3475335  |
| H  | -2.1740888 | 0.6464761  | 5.8085024  |

|   |            |            |           |
|---|------------|------------|-----------|
| H | -1.5308964 | -3.5477602 | 6.4125667 |
| H | 5.7989021  | -4.2171451 | 3.4727789 |
| H | -2.5615237 | -1.3739850 | 7.1270015 |
| H | 5.0236611  | 1.2210476  | 2.8445689 |
| H | 5.9895573  | -0.1418085 | 2.2132454 |
| H | 5.3054821  | 1.0639396  | 1.1077636 |
| H | -2.4598059 | 2.0238152  | 4.2651148 |
| H | -1.2982136 | 3.0558023  | 3.4180181 |
| H | -0.9593032 | 2.5032931  | 5.0719998 |
| H | 3.4195082  | 1.8762492  | 0.3376219 |
| H | 3.0177864  | 2.3498472  | 2.0045505 |
| H | 0.7014062  | 3.0522778  | 2.5321262 |
| H | -0.6278377 | 2.6821977  | 1.3873642 |

### **1 (with Methyl group)**

|    |            |            |            |
|----|------------|------------|------------|
| Fe | -0.6869895 | 0.6914513  | -1.3091276 |
| O  | -1.8451307 | 2.2036047  | -0.7820846 |
| O  | -0.8081452 | -1.0029311 | 0.0211953  |
| O  | -0.1505236 | 1.7655372  | -2.8715974 |
| N  | -2.5884236 | -0.2716047 | -1.6615224 |
| N  | 0.0827674  | -0.9624609 | -2.5134932 |
| C  | -3.8405958 | 1.7588901  | -2.0652800 |
| C  | 1.0027922  | 0.2852910  | -4.3886197 |
| C  | 0.5453248  | 1.5787836  | -3.9590732 |
| C  | 0.7183822  | -0.9066207 | -3.6400182 |
| C  | -2.9117449 | 2.6391081  | -1.4025011 |
| C  | -1.1991670 | -2.0802526 | -0.7983113 |
| C  | -3.6781233 | 0.3294421  | -2.0126864 |
| C  | -3.2178520 | 4.0265933  | -1.3947433 |
| C  | -2.5800934 | -1.7101815 | -1.3915964 |
| C  | -0.1224795 | -2.2633482 | -1.8748365 |
| C  | 1.7442662  | 0.1675685  | -5.5865767 |
| C  | 0.8660575  | 2.6945113  | -4.7810054 |
| C  | -5.2582593 | 3.6553745  | -2.6671870 |
| C  | 1.5989819  | 2.5418378  | -5.9471867 |
| C  | -5.0015849 | 2.2939940  | -2.6674746 |
| C  | 2.0482235  | 1.2731707  | -6.3636052 |
| C  | -4.3520640 | 4.5184838  | -2.0215295 |
| H  | -1.2882902 | -3.0147174 | -0.2164413 |
| H  | -2.5187102 | 4.6938172  | -0.8893668 |
| H  | -4.5458657 | 5.5930943  | -2.0094425 |
| H  | 0.5124913  | 3.6741451  | -4.4575369 |
| H  | -5.7025863 | 1.6046590  | -3.1455482 |
| H  | 2.0802693  | -0.8271451 | -5.8920720 |
| H  | 1.8287764  | 3.4206908  | -6.5533452 |
| H  | -6.1511241 | 4.0518601  | -3.1502787 |
| H  | 2.6235569  | 1.1643377  | -7.2828848 |

|    |            |            |            |
|----|------------|------------|------------|
| H  | -3.3620324 | -1.9452811 | -0.6524209 |
| H  | -2.7885083 | -2.2936500 | -2.3061298 |
| H  | -0.3998206 | -3.0384348 | -2.6112731 |
| H  | 0.8047156  | -2.5722926 | -1.3643793 |
| Fe | 0.6830389  | -0.6919274 | 1.3042656  |
| O  | 1.8384442  | -2.2079295 | 0.7815826  |
| O  | 0.8052893  | 1.0012026  | -0.0270020 |
| O  | 0.1429404  | -1.7641132 | 2.8669150  |
| N  | 2.5876481  | 0.2679316  | 1.6529642  |
| N  | -0.0789873 | 0.9647219  | 2.5102252  |
| C  | 3.8346664  | -1.7641540 | 2.0638452  |
| C  | -0.9928843 | -0.2783427 | 4.3916122  |
| C  | -0.5460715 | -1.5742038 | 3.9580749  |
| C  | -0.7066467 | 0.9120891  | 3.6414346  |
| C  | 2.9031587  | -2.6442574 | 1.4046923  |
| C  | 1.2007185  | 2.0784647  | 0.7904019  |
| C  | 3.6759185  | -0.3345054 | 2.0061964  |
| C  | 3.2041502  | -4.0328731 | 1.4040208  |
| C  | 2.5825113  | 1.7058754  | 1.3796803  |
| C  | 0.1273462  | 2.2644911  | 1.8697723  |
| C  | -1.7266828 | -0.1573170 | 5.5939963  |
| C  | -0.8696222 | -2.6889614 | 4.7802437  |
| C  | 5.2456309  | -3.6626534 | 2.6750555  |
| C  | -1.5948274 | -2.5329902 | 5.9507784  |
| C  | 4.9938079  | -2.3003701 | 2.6686222  |
| C  | -2.0333487 | -1.2619191 | 6.3713733  |
| C  | 4.3364268  | -4.5257065 | 2.0335747  |
| H  | 1.2899946  | 3.0123343  | 0.2075674  |
| H  | 2.5027794  | -4.7000536 | 0.9016943  |
| H  | 4.5262285  | -5.6010808 | 2.0271270  |
| H  | -0.5241906 | -3.6704354 | 4.4535894  |
| H  | 5.6970779  | -1.6111971 | 3.1435956  |
| H  | -2.0546456 | 0.8391368  | 5.9025492  |
| H  | -1.8269832 | -3.4111061 | 6.5571084  |
| H  | 6.1369932  | -4.0599417 | 3.1602601  |
| H  | -2.6027677 | -1.1505442 | 7.2940218  |
| H  | 3.3622157  | 1.9367229  | 0.6367927  |
| H  | 2.7963352  | 2.2910584  | 2.2918953  |
| H  | 0.4078702  | 3.0399929  | 2.6046108  |
| H  | -0.8006721 | 2.5743626  | 1.3613282  |
| H  | 1.0876389  | -1.8473845 | -4.0873244 |
| H  | -1.0681739 | 1.8547408  | 4.0910643  |
| H  | -4.5778555 | -0.2694082 | -2.2435012 |
| H  | 4.5770390  | 0.2629252  | 2.2352760  |
| Fe | -0.6869895 | 0.6914513  | -1.3091276 |
| O  | -1.8451307 | 2.2036047  | -0.7820846 |
| O  | -0.8081452 | -1.0029311 | 0.0211953  |



|    |            |            |            |
|----|------------|------------|------------|
| O  | -0.1505236 | 1.7655372  | -2.8715974 |
| N  | -2.5884236 | -0.2716047 | -1.6615224 |
| N  | 0.0827674  | -0.9624609 | -2.5134932 |
| C  | -3.8405958 | 1.7588901  | -2.0652800 |
| C  | 1.0027922  | 0.2852910  | -4.3886197 |
| C  | 0.5453248  | 1.5787836  | -3.9590732 |
| C  | 0.7183822  | -0.9066207 | -3.6400182 |
| C  | -2.9117449 | 2.6391081  | -1.4025011 |
| C  | -1.1991670 | -2.0802526 | -0.7983113 |
| C  | -3.6781233 | 0.3294421  | -2.0126864 |
| C  | -3.2178520 | 4.0265933  | -1.3947433 |
| C  | -2.5800934 | -1.7101815 | -1.3915964 |
| C  | -0.1224795 | -2.2633482 | -1.8748365 |
| C  | 1.7442662  | 0.1675685  | -5.5865767 |
| C  | 0.8660575  | 2.6945113  | -4.7810054 |
| C  | -5.2582593 | 3.6553745  | -2.6671870 |
| C  | 1.5989819  | 2.5418378  | -5.9471867 |
| C  | -5.0015849 | 2.2939940  | -2.6674746 |
| C  | 2.0482235  | 1.2731707  | -6.3636052 |
| C  | -4.3520640 | 4.5184838  | -2.0215295 |
| H  | -1.2882902 | -3.0147174 | -0.2164413 |
| H  | -2.5187102 | 4.6938172  | -0.8893668 |
| H  | -4.5458657 | 5.5930943  | -2.0094425 |
| H  | 0.5124913  | 3.6741451  | -4.4575369 |
| H  | -5.7025863 | 1.6046590  | -3.1455482 |
| H  | 2.0802693  | -0.8271451 | -5.8920720 |
| H  | 1.8287764  | 3.4206908  | -6.5533452 |
| H  | -6.1511241 | 4.0518601  | -3.1502787 |
| H  | 2.6235569  | 1.1643377  | -7.2828848 |
| H  | -3.3620324 | -1.9452811 | -0.6524209 |
| H  | -2.7885083 | -2.2936500 | -2.3061298 |
| H  | -0.3998206 | -3.0384348 | -2.6112731 |
| H  | 0.8047156  | -2.5722926 | -1.3643793 |
| Fe | 0.6830389  | -0.6919274 | 1.3042656  |
| O  | 1.8384442  | -2.2079295 | 0.7815826  |
| O  | 0.8052893  | 1.0012026  | -0.0270020 |
| O  | 0.1429404  | -1.7641132 | 2.8669150  |
| N  | 2.5876481  | 0.2679316  | 1.6529642  |
| N  | -0.0789873 | 0.9647219  | 2.5102252  |
| C  | 3.8346664  | -1.7641540 | 2.0638452  |
| C  | -0.9928843 | -0.2783427 | 4.3916122  |
| C  | -0.5460715 | -1.5742038 | 3.9580749  |
| C  | -0.7066467 | 0.9120891  | 3.6414346  |
| C  | 2.9031587  | -2.6442574 | 1.4046923  |
| C  | 1.2007185  | 2.0784647  | 0.7904019  |
| C  | 3.6759185  | -0.3345054 | 2.0061964  |
| C  | 3.2041502  | -4.0328731 | 1.4040208  |

|   |            |            |            |
|---|------------|------------|------------|
| C | 2.5825113  | 1.7058754  | 1.3796803  |
| C | 0.1273462  | 2.2644911  | 1.8697723  |
| C | -1.7266828 | -0.1573170 | 5.5939963  |
| C | -0.8696222 | -2.6889614 | 4.7802437  |
| C | 5.2456309  | -3.6626534 | 2.6750555  |
| C | -1.5948274 | -2.5329902 | 5.9507784  |
| C | 4.9938079  | -2.3003701 | 2.6686222  |
| C | -2.0333487 | -1.2619191 | 6.3713733  |
| C | 4.3364268  | -4.5257065 | 2.0335747  |
| H | 1.2899946  | 3.0123343  | 0.2075674  |
| H | 2.5027794  | -4.7000536 | 0.9016943  |
| H | 4.5262285  | -5.6010808 | 2.0271270  |
| H | -0.5241906 | -3.6704354 | 4.4535894  |
| H | 5.6970779  | -1.6111971 | 3.1435956  |
| H | -2.0546456 | 0.8391368  | 5.9025492  |
| H | -1.8269832 | -3.4111061 | 6.5571084  |
| H | 6.1369932  | -4.0599417 | 3.1602601  |
| H | -2.6027677 | -1.1505442 | 7.2940218  |
| H | 3.3622157  | 1.9367229  | 0.6367927  |
| H | 2.7963352  | 2.2910584  | 2.2918953  |
| H | 0.4078702  | 3.0399929  | 2.6046108  |
| H | -0.8006721 | 2.5743626  | 1.3613282  |
| H | 1.0876389  | -1.8473845 | -4.0873244 |
| H | -1.0681739 | 1.8547408  | 4.0910643  |
| H | -4.5778555 | -0.2694082 | -2.2435012 |
| H | 4.5770390  | 0.2629252  | 2.2352760  |

### **3 (with Methyl group)**

|    |            |            |            |
|----|------------|------------|------------|
| Fe | -1.5127953 | 1.2091950  | 0.2325197  |
| Fe | 1.0402140  | -0.8076743 | -0.1168477 |
| O  | -0.7295571 | -0.5612979 | 0.9079718  |
| O  | 0.2573123  | 0.9799177  | -0.7749029 |
| O  | 2.0853379  | -1.3069004 | 1.4508521  |
| O  | -2.3088302 | 2.4094616  | -1.0581764 |
| O  | 1.4481337  | -1.4637265 | -1.9053563 |
| O  | -2.6430388 | 1.5321072  | 1.7700288  |
| N  | 2.8538521  | 0.4930365  | -0.4058096 |
| N  | 0.2215649  | -2.8978320 | 0.0246233  |
| N  | -0.2239704 | 2.7423649  | 1.1773465  |
| N  | -2.8620137 | -0.2809144 | -0.6801013 |
| C  | -1.8283719 | 3.5669128  | 2.7980902  |
| C  | -4.2503619 | 1.2614857  | -1.9388372 |
| C  | -0.7961538 | -2.9343158 | 1.0692748  |
| C  | 4.3913445  | -0.9207523 | 0.7894862  |
| C  | 3.3665861  | -1.5535126 | 1.5794820  |
| C  | 1.6322003  | -3.8752140 | -1.6623450 |
| C  | 1.8939688  | -2.6227263 | -2.3240084 |

|   |            |            |            |
|---|------------|------------|------------|
| C | 0.7293372  | -3.9709568 | -0.5118618 |
| C | -3.4531697 | 2.4340875  | -1.6876290 |
| C | -1.6191677 | -1.6455222 | 0.9439185  |
| C | 4.0875060  | 0.1604263  | -0.1519222 |
| C | 3.7646017  | -2.4893888 | 2.5739383  |
| H | 2.9735288  | -2.9329798 | 3.1797388  |
| C | -2.4729068 | -1.6481872 | -0.3374203 |
| C | -3.9220977 | 3.6858548  | -2.1734324 |
| H | -3.2865416 | 4.5538651  | -1.9945637 |
| C | -2.8289459 | 2.5608771  | 2.5538691  |
| C | -3.8115959 | -0.0830277 | -1.5557912 |
| C | 2.6709156  | -2.6403860 | -3.5150885 |
| H | 2.8344708  | -1.6833324 | -4.0119672 |
| C | -5.1398404 | 3.8062380  | -2.8186310 |
| H | -5.4755219 | 4.7867709  | -3.1623186 |
| C | -4.0782637 | 2.6766124  | 3.2235200  |
| H | -4.8105366 | 1.8889875  | 3.0429051  |
| C | 1.1291835  | 2.7276466  | 0.6227450  |
| C | -0.4878618 | 3.4954529  | 2.2113902  |
| C | 1.1008165  | 2.1010777  | -0.7832758 |
| C | 2.4940687  | 1.6435184  | -1.2277035 |
| C | 5.7337839  | -1.3141178 | 1.0073583  |
| H | 6.5243854  | -0.8630885 | 0.4089344  |
| C | 2.2072851  | -5.0472888 | -2.2105362 |
| H | 2.0336948  | -6.0045223 | -1.7207129 |
| C | -2.1683674 | 4.6493196  | 3.6458964  |
| H | -1.4420796 | 5.4449458  | 3.8094007  |
| C | 6.0917154  | -2.2563339 | 1.9600242  |
| H | 7.1375276  | -2.5349611 | 2.0896572  |
| C | 5.0917149  | -2.8375866 | 2.7576456  |
| H | 5.3580206  | -3.5704793 | 3.5220420  |
| C | -4.3664845 | 3.7524911  | 4.0447415  |
| H | -5.3440356 | 3.8179018  | 4.5269160  |
| C | -5.9464400 | 2.6737661  | -3.0237685 |
| H | -6.9167175 | 2.7631240  | -3.5124569 |
| C | -5.4910738 | 1.4345836  | -2.6001179 |
| H | -6.1330963 | 0.5689976  | -2.7615060 |
| C | 3.2084234  | -3.8123600 | -4.0180730 |
| H | 3.8103241  | -3.7846616 | -4.9287479 |
| C | -3.4106438 | 4.7618737  | 4.2513092  |
| H | -3.6379236 | 5.6228068  | 4.8800304  |
| C | 2.9868640  | -5.0321423 | -3.3572096 |
| H | 3.4151844  | -5.9581733 | -3.7409805 |
| H | -2.2809680 | -1.5441511 | 1.8255849  |
| H | -1.4574661 | -3.8143368 | 1.0052870  |
| H | 0.7092068  | 2.8449050  | -1.5036759 |
| H | -0.3081182 | -2.9343143 | 2.0578044  |

|   |            |            |            |
|---|------------|------------|------------|
| H | -1.8591152 | -2.0661795 | -1.1578652 |
| H | 2.4325780  | 1.3336487  | -2.2840725 |
| H | 1.5693528  | 3.7379344  | 0.5716782  |
| H | 3.2116137  | 2.4769991  | -1.1498515 |
| H | 1.7806339  | 2.1059732  | 1.2659588  |
| H | -3.3468232 | -2.3074843 | -0.2000825 |
| C | 5.2630159  | 0.8733834  | -0.7932313 |
| H | 5.9139980  | 1.3310999  | -0.0351605 |
| H | 5.8743355  | 0.1507440  | -1.3520784 |
| H | 4.9470887  | 1.6478167  | -1.4963840 |
| C | 0.6199198  | 4.3120545  | 2.8509918  |
| H | 0.8520670  | 5.2075217  | 2.2519690  |
| H | 0.3639458  | 4.6343654  | 3.8634075  |
| H | 1.5396196  | 3.7152098  | 2.9088292  |
| C | -4.4762430 | -1.2699735 | -2.2285080 |
| H | -5.2170298 | -1.7416863 | -1.5628001 |
| H | -4.9805575 | -0.9889680 | -3.1564757 |
| H | -3.7268497 | -2.0343917 | -2.4706328 |
| C | 0.4021764  | -5.3598002 | 0.0036531  |
| H | -0.1088894 | -5.9606034 | -0.7625087 |
| H | 1.3298090  | -5.8880868 | 0.2647670  |
| H | -0.2227633 | -5.3330234 | 0.8998394  |

### 3 (without Methyl group)

|    |            |            |            |
|----|------------|------------|------------|
| Fe | -1.2886016 | 1.0264882  | 0.1691353  |
| Fe | 1.2894249  | -0.9927518 | -0.1514486 |
| O  | -0.5234005 | -0.7540085 | 0.8548569  |
| O  | 0.4939506  | 0.8183309  | -0.8314084 |
| O  | 2.2790528  | -1.6720928 | 1.4114679  |
| O  | -2.1606411 | 2.2443101  | -1.1030857 |
| O  | 1.9256894  | -1.5918677 | -1.9191384 |
| O  | -2.4534753 | 1.3907317  | 1.7104571  |
| N  | 3.0182626  | 0.3607194  | -0.2573890 |
| N  | 0.3844104  | -3.0020506 | -0.1552722 |
| N  | -0.0757182 | 2.6169494  | 1.0099414  |
| N  | -2.6764725 | -0.4366574 | -0.6300111 |
| C  | -1.7488493 | 3.5527706  | 2.5106810  |
| C  | -4.1938656 | 1.1132021  | -1.7357577 |
| C  | -0.5608706 | -3.1271088 | 0.9422110  |
| C  | 4.5058392  | -0.7455201 | 1.3036975  |
| C  | 3.5197293  | -1.6538787 | 1.8220906  |
| C  | 1.4776296  | -3.9586960 | -2.0949864 |
| C  | 2.0751950  | -2.7304776 | -2.5430232 |
| C  | 0.6243862  | -4.0006695 | -0.9398883 |
| C  | -3.3356377 | 2.2666843  | -1.6701024 |
| C  | -1.4116102 | -1.8481291 | 0.9220906  |
| C  | 4.1685988  | 0.2475110  | 0.3209945  |

|   |            |            |            |
|---|------------|------------|------------|
| C | 3.9304628  | -2.5540484 | 2.8425530  |
| H | 3.1810912  | -3.2363410 | 3.2453953  |
| C | -2.3461519 | -1.8161954 | -0.3050166 |
| C | -3.8050450 | 3.4686659  | -2.2671172 |
| H | -3.1507315 | 4.3400909  | -2.2251779 |
| C | -2.6667354 | 2.4459929  | 2.4469378  |
| C | -3.7863251 | -0.1736092 | -1.2442039 |
| C | 2.8484989  | -2.7760062 | -3.7350692 |
| H | 3.2946373  | -1.8436752 | -4.0831483 |
| C | -5.0523722 | 3.5355603  | -2.8667723 |
| H | -5.3838340 | 4.4784412  | -3.3067594 |
| C | -3.8431289 | 2.5210513  | 3.2419417  |
| H | -4.5332679 | 1.6776935  | 3.1999391  |
| C | 1.2819592  | 2.6731638  | 0.4878232  |
| C | -0.4894202 | 3.5404484  | 1.8192361  |
| C | 1.3375667  | 1.9486051  | -0.8730804 |
| C | 2.7555785  | 1.4489556  | -1.1851438 |
| C | 5.8262687  | -0.7844143 | 1.8061885  |
| H | 6.5565355  | -0.0805131 | 1.3977733  |
| C | 1.6817078  | -5.1474109 | -2.8319300 |
| H | 1.2121624  | -6.0666628 | -2.4717436 |
| C | -2.0533569 | 4.6628793  | 3.3331690  |
| H | -1.3394562 | 5.4902819  | 3.3695762  |
| C | 6.2028751  | -1.6847960 | 2.7890664  |
| H | 7.2271896  | -1.7055226 | 3.1604303  |
| C | 5.2367631  | -2.5693382 | 3.3061080  |
| H | 5.5181521  | -3.2797149 | 4.0861970  |
| C | -4.1096191 | 3.6285141  | 4.0304771  |
| H | -5.0277414 | 3.6554539  | 4.6211701  |
| C | -5.8974187 | 2.4093315  | -2.9172394 |
| H | -6.8763813 | 2.4726668  | -3.3919647 |
| C | -5.4582905 | 1.2196895  | -2.3612897 |
| H | -6.0912469 | 0.3290740  | -2.4016633 |
| C | 3.0335034  | -3.9616752 | -4.4287248 |
| H | 3.6393629  | -3.9596487 | -5.3372088 |
| C | -3.2164938 | 4.7169324  | 4.0821411  |
| H | -3.4351051 | 5.5828282  | 4.7067204  |
| C | 2.4535759  | -5.1647118 | -3.9818264 |
| H | 2.6059139  | -6.0912795 | -4.5348433 |
| H | -2.0089012 | -1.7736653 | 1.8498601  |
| H | -1.1756299 | -4.0431511 | 0.8672296  |
| H | 0.9912586  | 2.6302509  | -1.6722007 |
| H | 0.0031451  | -3.1489509 | 1.8880890  |
| H | 4.9664596  | 0.9706001  | 0.0717416  |
| H | -1.7970886 | -2.2403976 | -1.1639078 |
| H | 0.1303715  | -4.9691963 | -0.7390702 |
| H | 2.7588199  | 1.0444845  | -2.2096512 |

|   |            |            |            |
|---|------------|------------|------------|
| H | 0.1782152  | 4.3937866  | 2.0366549  |
| H | 1.6539333  | 3.7109236  | 0.4086316  |
| H | -4.4915003 | -1.0008546 | -1.4443155 |
| H | 3.5110723  | 2.2533853  | -1.1143778 |
| H | 1.9354571  | 2.1291762  | 1.1923213  |
| H | -3.2503217 | -2.4309371 | -0.1400379 |
